# Supplementary material
Source: Springer Nature journal article supplement (https://www.springermedizin.de/resource/supplementary/12877_2014_1064_MOESM2_ESM.pdf/9440740)
Supplement: MOESM2 [file 9440740]

Figure 2.1: prior fractures

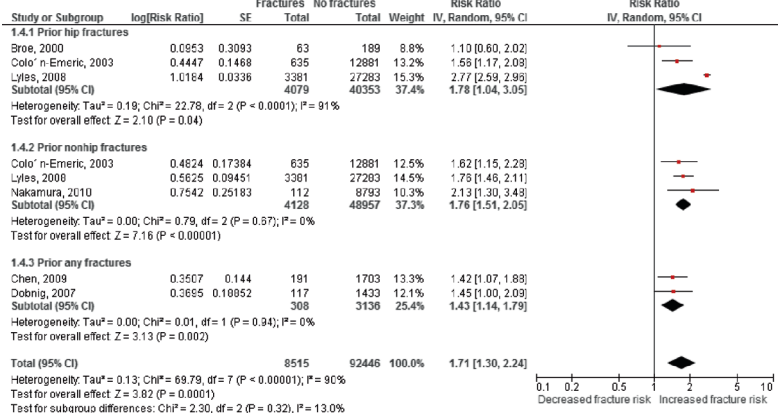

Figure 2.2: female

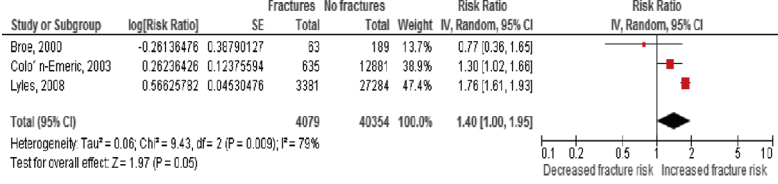

Figure 2.3: BMI (per kg/m<sup>2</sup> increase)

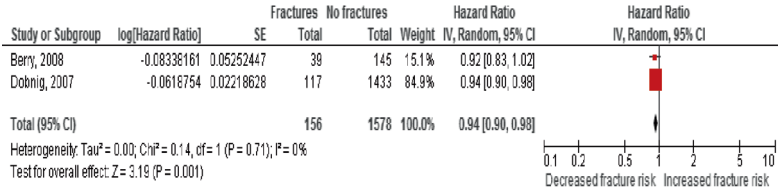

Figure 2.4: psychotropic medications

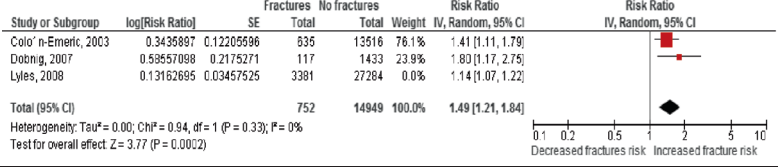

Figure 2.5: Cognitive impairment

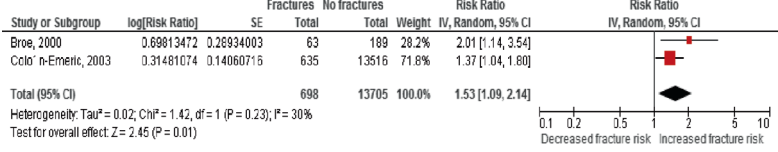

Figure 2.6: falls

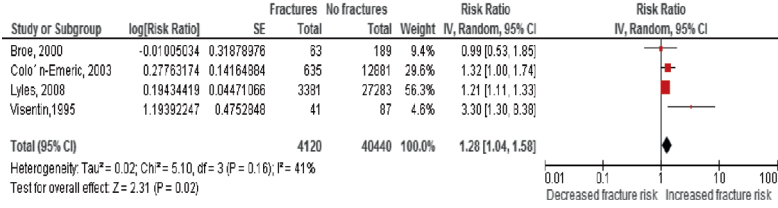

\*number of fractures and no fractures refer to the whole sample size and are not specific to each predictor.
